# Supplementary material for: The Use of Portion Control Plates to Promote Healthy Eating and Diet-Related Outcomes: A Scoping Review
Source: MDPI journal article supplement (doi:10.3390/nu14040892), 2022-02-20
Supplement: s1 [file s1]

Table S1: Search Strategy (Medline via Ovid)

|                             | <b>Concept 1 intervention<br/>(portion control plate)</b>                                                                                                                                                                                                                                                            | <b>Concept 2 (diet-related outcomes)</b>                                                                                                                                                                                                                                                                                                                                                                                                                                                          |
|-----------------------------|----------------------------------------------------------------------------------------------------------------------------------------------------------------------------------------------------------------------------------------------------------------------------------------------------------------------|---------------------------------------------------------------------------------------------------------------------------------------------------------------------------------------------------------------------------------------------------------------------------------------------------------------------------------------------------------------------------------------------------------------------------------------------------------------------------------------------------|
| MeSH<br>subject<br>headings | Nil                                                                                                                                                                                                                                                                                                                  | Vegetables/<br>"diet, food, and nutrition"/<br>Diet/<br>Dietary Fiber/<br>Diet, Healthy/<br>Energy Intake/<br>Serving Size/<br>Portion Size/<br>Nutritional Requirements/<br>Feeding Behavior/<br>Nutritive Value/<br>Weight Loss/<br>Health Education/<br>exp Health Promotion/<br>Public Health/<br>Consumer Health Information/<br>Patient Education as Topic/<br>Health Behavior/                                                                                                             |
| Keyword<br>searches         | (portion* adj2 (plate or<br>plates)).tw.<br>(portion adj2 tool*).tw. (13)<br>((plate or plates) adj2<br>tool*).tw.<br>(Nestle portion plate* or My<br>plate* or Eatwell plate*).tw.<br>((plate or plates) adj2 siz*).tw.<br>((food* or eat*) adj2 (plate or<br>plates)).tw.<br>((plate or plates) adj1<br>model).tw. | behavio?r.tw.<br>((fruit* or vegetable* or healthy food*) adj2 (intake*<br>or consum* or eat*)).tw.<br>((diet* or food*) adj2 guid*).tw.<br>(healthy adj2 eating).tw.<br>(healthy adj2 lifestyle).tw.<br>(guideline* adj2 adhere*).tw.<br>((eat* or diet* or intake) adj2 (pattern* or habit*)).tw.<br>diet* quality.tw.<br>portion size.tw.<br>portion control.tw.<br>(weight adj2 (loss or lose or reduction or reduc or<br>maint* or control)).tw.<br>(promot* or educat* or intervention).tw. |

Table S2: Quality Appraisal Table

| First author, year                              | Question 1 | Question 2 | Question 3 | Question 4 | Question 5 | Question 6 | Question 7 | Question 8 | Question 9 | Question 10 | Question 11 | Question 12 | Question 13 | Overall risk of bias <sup>a</sup> |
|-------------------------------------------------|------------|------------|------------|------------|------------|------------|------------|------------|------------|-------------|-------------|-------------|-------------|-----------------------------------|
| <i>Randomised controlled trials<sup>b</sup></i> |            |            |            |            |            |            |            |            |            |             |             |             |             |                                   |
| Almiron-roig, 2016                              | Unclear    | Unclear    | Yes        | No         | No         | Unclear    | Yes        | Unclear    | Unclear    | Yes         | Yes         | Yes         | No          | High                              |
| Bachman, 2013                                   | No         | Unclear    | Unclear    | No         | Unclear    | Unclear    | Yes        | Yes        | Unclear    | Yes         | Yes         | Yes         | No          | High                              |
| Bohnert, 2011                                   | Unclear    | Unclear    | Yes        | Yes        | Unclear    | Unclear    | Yes        | Yes        | Yes        | Yes         | Yes         | Yes         | Yes         | High                              |
| Ho, 2016                                        | Yes        | Yes        | Yes        | No         | No         | Unclear    | Yes        | Unclear    | Yes        | Yes         | Yes         | Yes         | Yes         | High                              |
| Huber, 2015                                     | Yes        | Yes        | No         | Yes         | Yes         | Yes         | Yes         | Low                               |
| Hughes, 2017 Study 1                            | Unclear    | Unclear    | Unclear    | No         | No         | Unclear    | Yes        | Yes        | Unclear    | Yes         | Yes         | Yes         | No          | High                              |
| Hughes, 2017 Study 2                            | Unclear    | Unclear    | Unclear    | No         | No         | Unclear    | Yes        | Yes        | Unclear    | Yes         | Yes         | Yes         | No          | High                              |
| Kesman, 2011                                    | Yes        | Yes        | Yes        | Yes        | Unclear    | Unclear    | Yes        | Yes        | Yes        | Yes         | Yes         | Yes         | Yes         | Low                               |
| Kline 2007                                      | Unclear    | Yes        | Yes        | Yes        | Unclear    | Unclear    | Yes        | Yes        | Yes        | Yes         | Yes         | Yes         | Yes         | High                              |
| <i>Cross-sectional studies<sup>c</sup></i>      |            |            |            |            |            |            |            |            |            |             |             |             |             |                                   |
| Arcan, 2019                                     | Yes        | Unclear    | Unclear    | Yes        | Yes        | Unclear    | Yes        | Yes        | N/A        | N/A         | N/A         | N/A         | N/A         | High                              |
| Lara, 2015                                      | Yes        | Yes        | Unclear    | Unclear    | Yes        | Yes        | Yes        | Yes        | N/A        | N/A         | N/A         | N/A         | N/A         | Low                               |
| Nydahl, 1993                                    | Yes        | No         | Unclear    | Yes        | No         | No         | Unclear    | Unclear    | N/A        | N/A         | N/A         | N/A         | N/A         | High                              |
| Tagtow, 2017                                    | Yes        | No         | No         | Unclear    | No         | No         | Unclear    | Unclear    | N/A        | N/A         | N/A         | N/A         | N/A         | High                              |
| Wansink 2013                                    | Yes        | Yes        | Unclear    | Yes        | Yes        | No         | Unclear    | Yes        | N/A        | N/A         | N/A         | N/A         | N/A         | High                              |
| <i>Quasi-experimental studies<sup>d</sup></i>   |            |            |            |            |            |            |            |            |            |             |             |             |             |                                   |
| Amaro, 2017                                     | Yes        | Yes        | Yes        | No         | Yes        | Yes        | Yes        | Unclear    | Yes        | N/A         | N/A         | N/A         | N/A         | Low                               |
| Blondin, 2018                                   | Yes        | Yes        | Yes        | No         | Yes        | Yes        | Yes        | Yes        | Unclear    | N/A         | N/A         | N/A         | N/A         | Low                               |
| Brown, 2014                                     | Yes        | Unclear    | Yes        | Yes        | Yes        | Unclear    | Yes        | Unclear    | Yes        | N/A         | N/A         | N/A         | N/A         | High                              |
| Edens, 2013                                     | Yes        | Unclear    | Unclear    | No         | Yes        | Yes        | Yes        | Yes        | Yes        | N/A         | N/A         | N/A         | N/A         | High                              |
| Ellsworth, 2014                                 | Yes        | Yes        | Yes        | No         | Yes        | No         | Yes        | Unclear    | Yes        | N/A         | N/A         | N/A         | N/A         | High                              |
| Melnick, 2018                                   | Yes        | Yes        | Yes        | No         | Yes        | No         | Yes        | Unclear    | Yes        | N/A         | N/A         | N/A         | N/A         | High                              |
| Shukaitis, 2021                                 | Yes        | Yes        | Yes        | Yes        | No         | Yes        | Yes        | Unclear    | Yes        | N/A         | N/A         | N/A         | N/A         | Low                               |
| <i>Qualitative<sup>e</sup></i>                  |            |            |            |            |            |            |            |            |            |             |             |             |             |                                   |
| Almiron-Roig, 2019                              | Unclear    | Yes        | No         | Yes        | Yes        | No         | No         | Yes        | Yes        | Yes         | Yes         | N/A         | N/A         | High                              |
| Shilts 2015                                     | Unclear    | Yes        | Unclear    | No         | Yes        | No         | No         | Yes        | Yes        | Yes         | N/A         | N/A         | N/A         | High                              |

<sup>a</sup> Studies were rated as high risk of bias if three or more criteria were Unclear or No, otherwise were rated as low risk of bias.

<sup>b</sup> The following 13 questions were used for randomised controlled trials. Question 1: Was true randomisation used for assignment of participants to treatment groups? Question 2: Was allocation to treatment groups concealed? Question 3: Were treatment groups similar at baseline? Question 4: Were participants blind to treatment assignment? Question 5: Were those delivering treatment blind to treatment assignment? Question 6: Were outcomes assessors blind to

treatment assignment? Question 7: Were treatment groups treated identically other than the intervention of interest? Question 8: Was follow up complete and if not, were differences between groups in terms of their follow up adequately described and analysed? Question 9: Were participants analysed in the groups to which they were randomised? Question 10: Were outcomes measured in the same way for treatment groups? Question 11: Were outcomes measured in a reliable way? Question 12: Was appropriate statistical analysis used? Question 13: Was the trial design appropriate, and any deviations from the standard RCT design (individual randomisation, parallel groups) accounted for in the conduct and analysis of the trial?

<sup>c</sup> The following 8 questions were used for cross-sectional studies. Question 1: Were the criteria for inclusion in the sample clearly defined? Question 2: Were the study subjects and the setting described in detail? Question 3: Was the exposure measured in a valid and reliable way? Question 4: Were objective, standard criteria used for measurement of the condition? Question 5: Were confounding factors identified? Question 6: Were strategies to deal with confounding factors stated? Question 7: Were the outcomes measured in a valid and reliable way? Question 8: Was appropriate statistical analysis used?

<sup>d</sup> The following 9 questions were used for quasi-experimental studies. Question 1: Is it clear in the study what is the 'cause' and what is the 'effect' (i.e. there is no confusion about which variable comes first)? Question 2: Were the participants included in any comparisons similar?

Question 3: Were the participants included in any comparisons receiving similar treatment/care, other than the exposure or intervention of interest? Question 4: Was there a control group? Question 5: Were there multiple measurements of the outcome both pre and post the intervention/ exposure? Question 6: Was follow up complete and if not, were differences between groups in terms of their follow up adequately described and analysed? Question 7: Were the outcomes of participants included in any comparisons measured in the same way? Question 8: Were outcomes measured in a reliable way? Question 9: Was appropriate statistical analysis used?

<sup>e</sup> The following 10 questions were used for qualitative studies. Question 1: Is there congruity between the stated philosophical perspective and the research methodology? Question 2: Is there congruity between the research methodology and the research question or objectives? Question 3: Is there congruity between the research methodology and the methods used to collect data? Question 4: Is there congruity between the research methodology and the representation and analysis of data? Question 5: Is there congruity between the research methodology and the interpretation of results? Question 6: Is there a statement locating the researcher culturally or theoretically? Question 7: Is the influence of the researcher on the research, and vice- versa, addressed? Question 8: Are participants, and their voices, adequately represented? Question 9: Is the research ethical according to current criteria or, for recent studies, and is there evidence of ethical approval by an appropriate body? Question 10: Do the conclusions drawn in the research report flow from the analysis, or interpretation, of the data?
